# Supplementary material
Source: MDPI journal article supplement (https://www.mdpi.com/1424-2818/15/11/1156)
Supplement: s1 [file s1]

**Supplementary Table S1.** Differences in the dominant taxa between endosphere and rhizosphere samples from *C. aequilaterus*.

| Genus                  | Mean of relative abundance (%) |             | <i>p</i> -value |
|------------------------|--------------------------------|-------------|-----------------|
|                        | Endosphere                     | Rhizosphere |                 |
| <i>Flavobacterium</i>  | 11.76                          | 3.94        | 0.09041         |
| <i>Rhodanobacter</i>   | 7.41                           | 3.19        | 0.1044          |
| <i>Streptomyces</i>    | 1.18                           | 5.83        | 0.1194          |
| <i>Rhodoplanes</i>     | 3.43                           | 3.25        | 0.7842          |
| <i>Flavisolibacter</i> | 3.28                           | 2.45        | 0.06379         |
| <i>Dokdonella</i>      | 4.46                           | 1.14        | 0.008149        |
| <i>Ramlibacter</i>     | 3.71                           | 2.48        | 0.1415          |
| <i>Sphingomonas</i>    | 3.39                           | 1.96        | 0.002165        |
| <i>Opitutus</i>        | 3.28                           | 0.77        | 0.009008        |
| <i>Kribbella</i>       | 0.87                           | 3.85        | 0.112           |

\* The normality and homogeneity of variance were tested and, according to acceptance or refusal of the test. The Wilcoxon test, t-test, or Welch`s were chosen to evaluate statistic differences ( $p < 0.05$ ) between samples ( $n = 3$ ).
